# Supplementary material for: The Cotton BEL1-Like Transcription Factor GhBLH7-D06 Negatively Regulates the Defense Response against Verticillium dahliae
Source: MDPI journal article supplement (doi:10.3390/ijms21197126), 2020-09-27
Supplement: s1 [file GhBLH7-Table S1.xlsx]

## Sheet: Sheet1
Table S1 The results of Y2H library screening
	Prey Protein	Accession number
1	histidine kinase 4-like	XM_016849422
2	polyubiquitin-like	XM_016855771
3	aldehyde dehydrogenase family 3 member F1-like	XM_016895330
4	WD repeat domain-containing protein 83-like	XM_016846099
5	eukaryotic initiation factor 4A-10	XM_016894166
6	14-3-3 protein 7-like	NM_001326903
7	cytoplasmic 60S subunit biogenesis factor REI1 homolog 1-like	XM_016862564
8	transcription repressor OFP3-like	XM_012608061
9	GTP-binding protein SAR1A-like	XM_016857844
10	probable protein phosphatase 2C 46	XM_016881813
11	telomere repeat-binding factor 1-like	XM_016836110
12	E3 ubiquitin-protein ligase MIEL1-like	XM_016900330
13	Homeobox protein knotted-1-like 3	XM_016875949
14	FAM133-like	XM_016896190
15	uncharacterized	XM_016837752
16	Spot37 peroxiredoxin	FJ415174
17	phosphoinositide phosphatase SAC2-like	XM_016842493
18	subtilisin-like protease SBT1.5	XM_016894097
19	60S ribosomal protein L5-like	XM_016835690
20	E3 ubiquitin-protein ligase MIEL1-like	XM_016871043
21	triose phosphate/phosphate translocator, non-green plastid, chloroplastic-like	XM_016872633
22	ubiquitin-conjugating enzyme E2-17 kDa-like	XM_016857131
23	uncharacterized	XM_016828189
24	NADH dehydrogenase [ubiquinone] 1 beta subcomplex subunit 9-like	XM_016859178
25	plastidial lipoyltransferase 2-like	XM_016875638
26	flavin-containing monooxygenase FMO GS-OX5-like	XM_016839878
27	trans-cinnamate 4-monooxygenase-like	XM_016868687
28	2-keto-3-deoxy-L-rhamnonate aldolase-like	XM_016885636
29	high mobility group B protein 3-like	XM_016852083
30	uncharacterized	XM_016824910
31	serine/threonine-protein phosphatase 2A 65 kDa regulatory subunit A isoform	XM_016854089
32	uncharacterized	XM_016899136
