# Supplementary material for: The Cotton BEL1-Like Transcription Factor GhBLH7-D06 Negatively Regulates the Defense Response against Verticillium dahliae
Source: MDPI journal article supplement (doi:10.3390/ijms21197126), 2020-09-27
Supplement: s1 [file GhBLH7-Table S2.xlsx]

## Sheet: Sheet1
Table S2 Primers used in the study
Name	sequences
GhBLH7-qF	ATGGACTCAAACTTCAAATC	qRT-PCR
GhBLH7-qR	CTGTTCGGTTCTACATCGGG	qRT-PCR
Y-GhBLH7-F	GAGAACACGGGGGACTCTAGAATGGCTACTTATTATCCAAG	Sub-local
Y-GhBLH7-R	TTACTCATACTAGTCCCGGGTCCGACTACAAAATCATGC	Sub-local
35S	GACGCACAATCCCACTATCC	Sub-local
NOS-R	AATCATCGCAAGACCGGC	Sub-local
GFP-R	CACCTTCACCCTCTCCACTG	Sub-local
TRV-GhBLH7-F	TGTGAGTAAGGTTACCGAATTCCAGACAGGTCTGACCCGAAAC	VIGS
TRV-GhBLH7-R	GCGTGAGCTCGGTACCGGATCCTGGCCTGTTCGGTTCTACATC	VIGS
TRV2-F	CTTTATTATTACGGACGAGTG	VIGS
TRV2-R	CCCTATGGTAAGACAATGAGT	VIGS
TRV1-F	GCTCCTGAAAGTATGTTAGTGG	VIGS
TRV1-R	ACTCAGATGCCGAATACAGAC	VIGS
BD-GhBLH7-F	atatggccatggaggccgaattcATGGCTACTTATTATCCAAG	Y2H
BD-GhBLH7-R	ggccgctgcaggtcgacggatccTCAGACTACAAAATCATGCAAT	Y2H
AD-GhOFP3-F	TGGCCATGGAGGCCAGTGAATTCATGGGTAATTACAGGTTCAG	Y2H
AD-GhOFP3-R	TGCAGCTCGAGCTCGATGGATCCTTACAAGCGTAGGTTGGTCAT	Y2H
T7	TAATACGACTCACTATAGGG	Y2H
3-AD	AGATGGTGCACGATGCACAG	Y2H
3-BD	TAAGAGTCACTTTAAAATTTGTAT	Y2H
GhOFP3-qF	CAAAAGAAACCTCCCACAT	qRT-PCR
GhOFP3-qR	TGAAACCAGCAGACGCAGA	qRT-PCR
GhKNAT3-qF	GGTGGCTATCGTGCTCGTCG	qRT-PCR
GhKNAT3-qR	TGGTCTCGCTGTTGCTGTTC	qRT-PCR
pNC-GhBLH7-F	TGGCGCGCCACTAGTGGATCCATGGCTACTTATTATCCAAG	BiFC
pNC-GhBLH7-R	GACAGTACTATCGATGGATCCTCCGACTACAAAATCATGC	BiFC
pNC-GhOFP3-F	TGGCGCGCCACTAGTGGATCCATGGGTAATTACAGGTTCAG	BiFC
pNC-GhOFP3-R	GACAGTACTATCGATGGATCCTTACAAGCGTAGGTTGGTCAT	BiFC
AD-GhBLH7-F	TGGCCATGGAGGCCAGTGAATTCATGGCTACTTATTATCCAAG	Y1H
AD-GhBLH7-R	TGCAGCTCGAGCTCGATGGATCCTCCGACTACAAAATCATGC	Y1H
pHIS2-pGhPAL-F	GACTCACTATAGGGCGAATTCAAACTTGTAAAATTATTTGG	Y1H
pHIS2-pGhPAL-R	GATTCGCGAACGCGTGAGCTCTGCCAAAAAGGAGGAAAAC	Y1H
Luc-pGhPAL-F	gtcgacggtatcgataagcttAAACTTGTAAAATTATTTGG	Dual-Luc
Luc-pGhPAL-R	cgctctagaactagtggatccTGCCAAAAAGGAGGAAAAC	Dual-Luc
SK-GhBLH7-F	cgctctagaactagtggatccATGGCTACTTATTATCCAAG	Dual-Luc
SK-GhBLH7-R	gtcgacggtatcgataagcttTCCGACTACAAAATCATGC	Dual-Luc
SK-GhOFP3-F	cgctctagaactagtggatccATGGGTAATTACAGGTTCAG	Dual-Luc
SK-GhOFP3-R	gtcgacggtatcgataagcttTTACAAGCGTAGGTTGGTCAT	Dual-Luc
62SK-R	ATTTCAGCGTACCGAATTGG	Dual-Luc
800LUC-R	CTTTCTTTATGTTTTTGG	Dual-Luc
GhPAL-A06F	GGGAGATACTTGAAGCGAT	qRT-PCR
GhPAL-A06R	TTGGAGTTATGTCTGCCTG	qRT-PCR
GhPAL-D01F	CAAGGATACTCTGGCATTAG	qRT-PCR
GhPAL-D01R	TCAAGGGATTCTCCATTAG	qRT-PCR
GhCAD9-D03F	ATCCCCTACTTCCACTGCT	qRT-PCR
GhCAD9-D03R	TTTCTTTCATCCCTCCAAC	qRT-PCR
GhCAD6-D05F	CATCAAGTAACCGTCATCAG	qRT-PCR
GhCAD6-D05R	AATAACATCTAGCGTCCTCTT	qRT-PCR
GhHST-A10F	TTTGTCTTGGAGTAGGGATT	qRT-PCR
GhHST-A10R	CAACATGGTGGAGCTTAGG	qRT-PCR
GhHST-D05F	CTGAAGAGGGACGAGGATG	qRT-PCR
GhHST-D05R	GCAAAACCAAGAGTGGATAC	qRT-PCR
Gh4CLL6-D08F	CCAAAGGTGCTACCAATACT	qRT-PCR
Gh4CLL6-D08R	GCCATAACCCTGAATGAAAT	qRT-PCR
Gh4CL1-D10F	GATTGTGCCACCGATAGTTT	qRT-PCR
Gh4CL1-D10R	TGGTCCAGCTTCTGTCATTC	qRT-PCR
GhCOMT1-D12F	ACAAGTCACCCTCCTATCC	qRT-PCR
GhCOMT1-D12R	ACCGCATCCACTACTATCAC	qRT-PCR
GhCOMT1-D13F	TTACTGATGAAGACGGAAAC	qRT-PCR
GhCOMT1-D13R	TCACAAATGACAACCCACC	qRT-PCR
GhCCOAOMT1-A04F	ATCAATGCGAAGAATACC	qRT-PCR
GhCCOAOMT1-A04R	TTACAGGCAATCCTAACTC	qRT-PCR
GhFAOMT-D04F	CAATGATTTGAGCGTCGTG	qRT-PCR
GhFAOMT-D04R	CAGGCAATGTAAGGGCAGT	qRT-PCR
GhLAC1-A05F	ACAACATCACTACTGGCATTT	qRT-PCR
GhLAC1-A05R	GGATTCTGGGAGACTTTCG	qRT-PCR
GhLAC9-D05F	CTATGGCTTCACCATTCACT	qRT-PCR
GhLAC9-D05R	AAAGGGTTCCTATTTCGTC	qRT-PCR
GhLOX1-A08F	CACCGATGCAATTCCCCTAG	qRT-PCR
GhLOX1-A08R	CCAGAAATGCCAACATCACCT	qRT-PCR
GhLOX2-A05F	AATAGGTGCTGTGGTCGTT	qRT-PCR
GhLOX2-A05R	CTCTTTAATCCGCTTGGT	qRT-PCR
GhLOX3A09F	ATACGCAACAGACGGCTTAC	qRT-PCR
GhLOX3-A09R	GATAATGGTGGTGAGGATGG	qRT-PCR
GhLOX5-D08F	AATGATAAACGGGAAAGGTGT	qRT-PCR
GhLOX5-D08R	AATGGCTAACTAACTGGTGGT	qRT-PCR
GhJAZ1-A08F	GACGATCTTTTACTGCGGAC	qRT-PCR
GhJAZ1-A08R	CACGACTTGTTGATACATTGG	qRT-PCR
GhJAZ2-D10F	AGAGCCATTCTTATGATTGC	qRT-PCR
GhJAZ2-D10R	GATTCTTTCGTTTTTGGAGG	qRT-PCR
GhOPR3-D05F	GACACTGGAGCAGGGTTTC	qRT-PCR
GhOPR3-D05R	GATGGGCTTGTTTGTTGAG	qRT-PCR
GhMYC2-D08F	AGACAACAAACGACGACCT	qRT-PCR
GhMYC2-D08R	TAGAACCATTCAGCCTCAC	qRT-PCR
